# Supplementary material for: Forecasting the Value for Money of Mobile Maternal Health Information Messages on Improving Utilization of Maternal and Child Health Services in Gauteng, South Africa: Cost-Effectiveness Analysis
Source: PubMed Central journal article supplement (PMC6086931; doi:10.2196/mhealth.8185), 2018-07-27

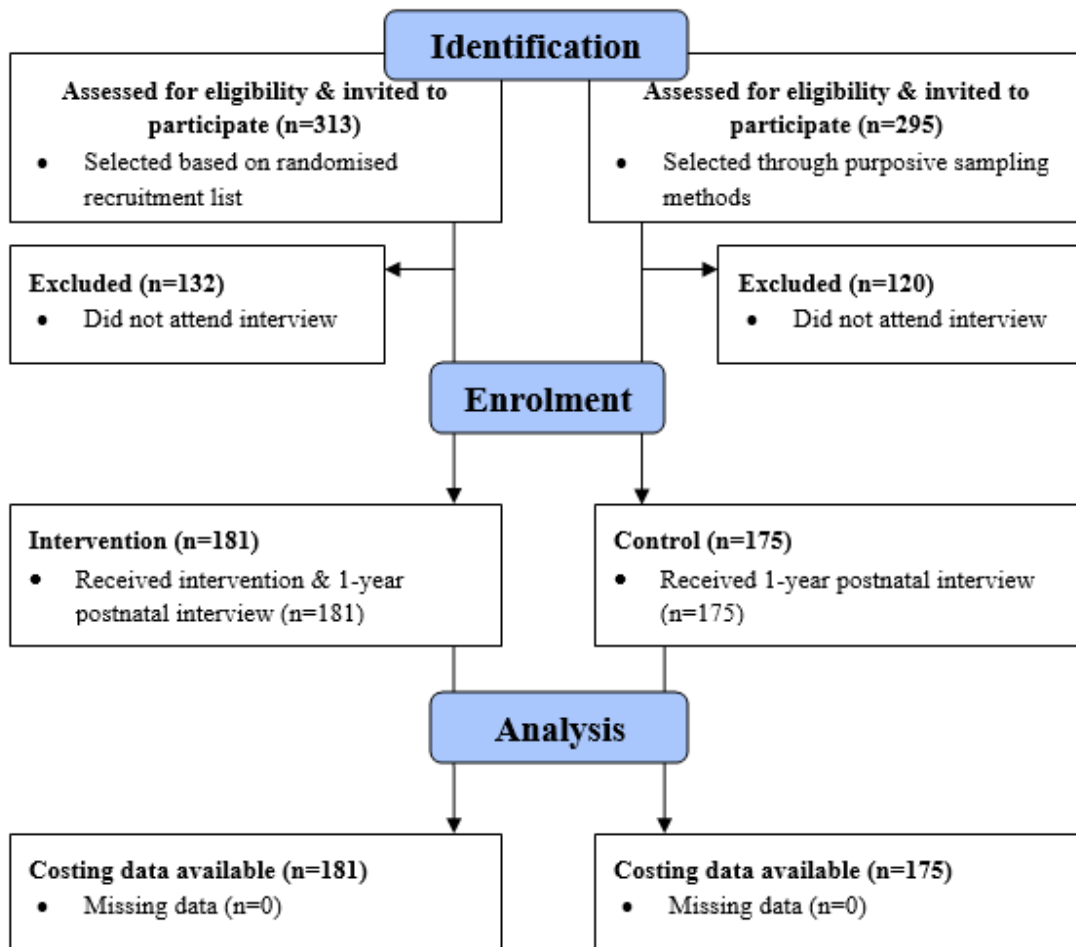

Supplement: mhealth_v6i7e153_app1.pdf [file mhealth_v6i7e153_app1.pdf]
