# Supplementary material for: Forecasting the Value for Money of Mobile Maternal Health Information Messages on Improving Utilization of Maternal and Child Health Services in Gauteng, South Africa: Cost-Effectiveness Analysis
Source: PubMed Central journal article supplement (PMC6086931; doi:10.2196/mhealth.8185), 2018-07-27
Supplement: mhealth_v6i7e153_app2.pdf [file mhealth_v6i7e153_app2.pdf]

Parameters for probabilistic sensitivity analysis drawing from year 5 costs. (All currency in US \$)

| Parameter                  | MAMA <sup>c</sup>                                                         |             |             | Comparison       |             |            | Incremental |                  |
|----------------------------|---------------------------------------------------------------------------|-------------|-------------|------------------|-------------|------------|-------------|------------------|
|                            | <i>Base case</i>                                                          | <i>High</i> | <i>Low</i>  | <i>Base case</i> | <i>High</i> | <i>Low</i> |             |                  |
| Effects                    |                                                                           |             |             |                  |             |            |             |                  |
|                            | Proportion ANC <sup>d</sup> 4+                                            | 72%         | 85%         | 55%              | 46%         | 53%        | 38%         | 26%              |
|                            | Number ANC 4+ Gauteng                                                     | 129,284     | 152,627     | 98,759           | 82,598      | 95,168     | 68,233      | 46,686           |
|                            | Proportion Fully immunized                                                | 95%         | 98%         | 92%              | 90%         | 94%        | 84%         | 5%               |
|                            | Number Fully immunized                                                    | 170,584     | 175,970     | 165,197          | 161,605     | 168,788    | 150,832     | 8978             |
|                            | Proportion ANC4+ & Fully immunized                                        | 67%         | 75%         | 57%              | 39%         | 53%        | 26%         |                  |
|                            | Number ANC4+ & Fully immunized                                            | 120,306     | 134,671     | 102,350          | 70,029      | 95,168     | 46,686      | 50,277           |
|                            | Inputs into Lives Saved Tool                                              |             |             |                  |             |            |             |                  |
|                            | ANC <sup>a</sup>                                                          | 98%         | 99%         | 91%              | 84%         | 87%        | 82%         | 14%              |
|                            | Bacillus Calmette–Guérin                                                  | 99%         | 100%        | 86%              | 97%         | 99%        | 83%         | 2%               |
|                            | Polio - 3 doses                                                           | 99%         | 99%         | 86%              | 98%         | 99%        | 85%         | 1%               |
|                            | Pentavalent                                                               | 99%         | 99%         | 86%              | 97%         | 99%        | 78%         | 2%               |
|                            | Pneumococcal - 3 doses                                                    | 98%         | 99%         | 96%              | 94%         | 98%        | 82%         | 4%               |
|                            | Measles- single doses                                                     | 98%         | 99%         | 96%              | 94%         | 98%        | 82%         | 4%               |
|                            | Incremental Lives Saved <sup>b</sup>                                      |             |             |                  |             |            |             | 182 (109-199)    |
|                            | Disability adjusted live years averted (3% discounting, no age weighting) |             |             |                  |             |            |             | 5145 (3080-5628) |
| Provider costs             |                                                                           |             |             |                  |             |            |             |                  |
|                            | Peer educator time costs to register MAMA users                           | \$0.08      | \$0.11      | \$0.04           | -           | -          | -           |                  |
| Registration costs Gauteng |                                                                           | \$13,808.85 | \$20,188.24 | \$7747.75        |             |            |             | \$13,808.85      |

|                |                                |                                                                    |                     |                     |                     |                     |                     |                     |                     |
|----------------|--------------------------------|--------------------------------------------------------------------|---------------------|---------------------|---------------------|---------------------|---------------------|---------------------|---------------------|
|                |                                | ANC 1 Group counseling (5 minute peer educator)                    | \$0.26              | \$0.37              | \$0.14              | \$0.26              | \$0.37              | \$0.14              |                     |
|                |                                | ANC 1 One on one consultation (10 minute Nurse time)               | \$1.03              | \$1.50              | \$0.58              | \$1.03              | \$1.50              | \$0.58              |                     |
|                |                                | Total ANC1                                                         | <i>\$1.28</i>       | <i>\$1.87</i>       | <i>\$0.72</i>       | <i>\$1.28</i>       | <i>\$1.87</i>       | <b>\$0.72</b>       |                     |
|                |                                | ANC 2                                                              | \$1.03              | \$1.50              | \$0.58              | \$1.03              | \$1.50              | \$0.58              |                     |
|                |                                | ANC 3                                                              | \$1.03              | \$1.50              | \$0.58              | \$1.03              | \$1.50              | \$0.58              |                     |
|                |                                | ANC 4                                                              | \$1.03              | \$1.50              | \$0.58              | \$1.03              | \$1.50              | \$0.58              |                     |
|                |                                | Total ANC 4+                                                       | <i>\$4.36</i>       | <i>\$6.37</i>       | <i>\$2.45</i>       | <i>\$4.36</i>       | <i>\$6.37</i>       | <b>\$2.45</b>       |                     |
| ANC 4+ Gauteng |                                |                                                                    | <i>\$563,401.28</i> | <i>\$629,200.02</i> | <i>\$373,183.51</i> | <i>\$359,950.82</i> | <i>\$434,720.02</i> | <i>\$232,690.89</i> | <i>\$203,450.46</i> |
|                |                                | PNC <sup>e</sup> 1 (10 minute Nurse time)                          | \$1.03              | \$1.50              | \$0.58              | \$1.03              | \$1.50              | \$0.58              |                     |
|                |                                | PNC 2 (5 minute Nurse time)                                        | \$0.51              | \$0.75              | \$0.29              | \$0.51              | \$0.75              | \$0.29              |                     |
|                |                                | PNC 3 (5 minute Nurse time)                                        | \$0.51              | \$0.75              | \$0.29              | \$0.51              | \$0.75              | \$0.29              |                     |
|                |                                | PNC 4 (5 minute Nurse time)                                        | \$0.51              | \$0.75              | \$0.29              | \$0.51              | \$0.75              | \$0.29              |                     |
|                |                                | PNC 5 (5 minute Nurse time)                                        | \$0.51              | \$0.75              | \$0.29              | \$0.51              | \$0.75              | \$0.29              |                     |
|                |                                | Total PNC 5                                                        | <i>\$3.08</i>       | <i>\$4.50</i>       | <i>\$1.73</i>       | <i>\$3.08</i>       | <i>\$4.50</i>       | <i>\$1.73</i>       |                     |
|                |                                | <i>PNC5+ (Fully immunized) Gauteng</i>                             | <i>\$524,736.48</i> | <i>\$742,927.09</i> | <i>\$303,711.97</i> | <i>\$497,118.77</i> | <i>\$678,324.73</i> | <i>\$291,315.57</i> | <i>\$27,617.71</i>  |
|                |                                | <i>Total provider cost per ANC4+ &amp; Fully immunized Gauteng</i> | <i>1,101,947</i>    | <i>1,392,315</i>    | <i>684,643</i>      | <i>857,070</i>      | <i>1,113,045</i>    | <i>524,006</i>      | <i>\$244,877.03</i> |
| Users' costs   |                                |                                                                    |                     |                     |                     |                     |                     |                     |                     |
|                | Mean cost per person per visit |                                                                    |                     |                     |                     |                     |                     |                     |                     |
|                |                                | Food                                                               | \$0.03              | \$0.03              | \$0.03              | \$0.03              | \$0.03              | \$0.03              | \$-                 |
|                |                                | Wages lost (self)                                                  | \$0.18              | \$0.24              | \$0.11              | \$0.18              | \$0.24              | \$0.11              | \$-                 |
|                |                                | Wages lost (spouse)                                                | \$1.31              | \$1.44              | \$1.18              | \$1.31              | \$1.44              | \$1.18              | \$-                 |
|                |                                | Child care for other children                                      | \$0.07              | \$0.26              | \$(0.13)            | \$0.07              | \$0.26              | \$(0.13)            | \$-                 |
|                |                                | Transport                                                          | \$0.08              | \$0.34              | \$(0.18)            | \$0.08              | \$0.34              | \$(0.18)            | \$-                 |
|                |                                | <i>sub-total</i>                                                   | <i>\$1.66</i>       | <i>\$2.31</i>       | <i>\$1.01</i>       | <i>\$1.66</i>       | <i>\$2.31</i>       | <i>\$1.01</i>       | <i>\$-</i>          |
|                |                                | ANC Visit 1                                                        | \$1.66              | \$2.31              | \$1.01              | \$1.66              | \$2.31              | \$1.01              | \$-                 |
|                |                                | ANC Visit 2                                                        | \$1.66              | \$2.31              | \$1.01              | \$1.66              | \$2.31              | \$1.01              | \$-                 |

|  |                                                  |                                                                 |                       |                       |                       |                       |                       |                       |                     |
|--|--------------------------------------------------|-----------------------------------------------------------------|-----------------------|-----------------------|-----------------------|-----------------------|-----------------------|-----------------------|---------------------|
|  |                                                  | ANC Visit 3                                                     | \$1.66                | \$2.31                | \$1.01                | \$1.66                | \$2.31                | \$1.01                | \$-                 |
|  |                                                  | ANC Visit 4                                                     | \$1.66                | \$2.31                | \$1.01                | \$1.66                | \$2.31                | \$1.01                | \$-                 |
|  |                                                  | <i>Total ANC 1-4</i>                                            | <i>\$6.64</i>         | <i>\$9.24</i>         | <i>\$4.04</i>         | <i>\$6.64</i>         | <i>\$9.24</i>         | <i>\$4.04</i>         | <i>\$-</i>          |
|  |                                                  | <i>ANC 4+ Gauteng</i>                                           | <i>\$858,608.44</i>   | <i>\$912,433.05</i>   | <i>\$617,146.13</i>   | <i>\$548,555.39</i>   | <i>\$630,408.29</i>   | <i>\$384,808.76</i>   | <i>\$310,053.05</i> |
|  |                                                  | PNC Visit 1: Birth                                              | \$1.48                | \$2.07                | \$0.90                | \$1.48                | \$2.07                | \$0.90                | \$-                 |
|  |                                                  | PNC Visit 2: 6 week                                             | \$1.48                | \$2.07                | \$0.90                | \$1.48                | \$2.07                | \$0.90                | \$-                 |
|  |                                                  | PNC Visit 3: 10 week                                            | \$1.48                | \$2.07                | \$0.90                | \$1.48                | \$2.07                | \$0.90                | \$-                 |
|  |                                                  | PNC Visit 4: 14 week                                            | \$1.48                | \$2.07                | \$0.90                | \$1.48                | \$2.07                | \$0.90                | \$-                 |
|  |                                                  | PNC Visit 5: 9 months                                           | \$1.66                | \$2.31                | \$1.01                | \$1.66                | \$2.31                | \$1.01                | \$-                 |
|  |                                                  | <i>Total PNC</i>                                                | <i>\$7.60</i>         | <i>\$10.59</i>        | <i>\$4.61</i>         | <i>\$7.60</i>         | <i>\$10.59</i>        | <i>\$4.61</i>         | <i>\$-</i>          |
|  |                                                  | <i>PNC5+ (Fully immunized) Gauteng</i>                          | <i>\$1,296,345.38</i> | <i>\$1,748,920.14</i> | <i>\$811,585.05</i>   | <i>\$1,228,116.68</i> | <i>\$1,596,840.13</i> | <i>\$778,459.13</i>   | <i>\$68,228.70</i>  |
|  |                                                  | <i>Total users cost per ANC4+ &amp; Fully immunized Gauteng</i> | <i>\$2,154,953.82</i> | <i>\$2,661,353.19</i> | <i>\$1,428,731.18</i> | <i>\$1,776,672.07</i> | <i>\$2,227,248.42</i> | <i>\$1,163,267.89</i> | <i>\$378,281.75</i> |
|  | <i>Annual program costs at maturity (year 5)</i> |                                                                 |                       |                       |                       |                       |                       |                       |                     |
|  | <i>Implementation support</i>                    |                                                                 |                       |                       |                       |                       |                       |                       |                     |
|  |                                                  | Development                                                     | \$0.23                | \$0.28                | \$0.17                |                       |                       |                       | \$0.23              |
|  |                                                  | Start-up                                                        | \$0.11                | \$0.14                | \$0.08                |                       |                       |                       | \$0.11              |
|  |                                                  | Training                                                        | \$0.00                | \$0.00                | \$0.00                |                       |                       |                       | \$0.00              |
|  |                                                  | Personnel                                                       | \$0.12                | \$0.15                | \$0.09                |                       |                       |                       | \$0.12              |
|  |                                                  | Buildings                                                       | \$0.04                | \$0.04                | \$0.03                |                       |                       |                       | \$0.04              |
|  |                                                  | Transport                                                       | \$0.02                | \$0.02                | \$0.01                |                       |                       |                       | \$0.02              |
|  |                                                  | Communication                                                   | \$0.00                | \$0.00                | \$0.00                |                       |                       |                       | \$0.00              |
|  |                                                  | <i>Sub-total implementation support</i>                         | <i>\$0.51</i>         | <i>\$0.64</i>         | <i>\$0.39</i>         |                       |                       |                       | <i>\$0.51</i>       |
|  | <i>Technology costs</i>                          |                                                                 |                       |                       |                       |                       |                       |                       |                     |
|  |                                                  | Start-up/Development                                            | \$0.00                | \$0.01                | \$0.00                |                       |                       |                       | \$0.00              |
|  |                                                  | Content maintenance                                             | \$0.05                | \$0.07                | \$0.04                |                       |                       |                       | \$0.05              |
|  |                                                  | Technology maintenance                                          | \$0.11                | \$0.14                | \$0.08                |                       |                       |                       | \$0.11              |

|  |                              |                |                |                |                |                |                |                |
|--|------------------------------|----------------|----------------|----------------|----------------|----------------|----------------|----------------|
|  | Project management/personnel | \$0.10         | \$0.12         | \$0.07         |                | \$0.10         |                |                |
|  | M&E                          | \$0.00         | \$0.00         | \$0.00         |                | \$0.00         |                |                |
|  | Building/ Overhead           | \$0.07         | \$0.09         | \$0.06         |                | \$0.07         |                |                |
|  | Travel                       | \$0.02         | \$0.02         | \$0.01         |                | \$0.02         |                |                |
|  | SMS text message delivery    | \$1.38         | \$2.36         | \$1.02         |                | \$1.38         |                |                |
|  | SMS text message translation | \$0.01         | \$0.01         | \$0.01         |                |                |                |                |
|  | Printing                     | \$-            | \$-            | \$-            |                | \$-            |                |                |
|  | <i>Sub-total technology</i>  | \$1.74         | \$2.83         | \$1.30         |                | \$1.74         |                |                |
|  | Total program cost per user  | \$2.26         | \$3.47         | \$1.69         |                | \$2.26         |                |                |
|  | Total program cost Gauteng   | \$405,491.14   | \$623,318.87   | \$303,252.74   |                | \$405,491.14   |                |                |
|  | Total societal cost Gauteng  | \$3,662,391.57 | \$4,676,987.41 | \$2,416,627.15 | \$2,633,741.65 | \$3,340,293.16 | \$1,687,274.35 | \$1,028,649.91 |

<sup>a</sup>Utilization rates for ANC 2 have been inputted into LiST, which does not allow for differentiation between utilization of ANC 1-4; instead allowing for data on co-coverage of interventions or a flat coverage estimate to be inputted. The assumption in using ANC 2 is that the majority of clinical services in South Africa are provided within the first 2 ANC visits.

<sup>b</sup>Sub-national estimated adjusted based on sample population.

<sup>c</sup>MAMA: Mobile Alliance for Maternal Action;

<sup>d</sup>ANC: antenatal care;

<sup>e</sup>PNC: postnatal care
