# Supplementary material for: Forecasting the Value for Money of Mobile Maternal Health Information Messages on Improving Utilization of Maternal and Child Health Services in Gauteng, South Africa: Cost-Effectiveness Analysis
Source: PubMed Central journal article supplement (PMC6086931; doi:10.2196/mhealth.8185), 2018-07-27
Supplement: mhealth_v6i7e153_app3.pdf [file mhealth_v6i7e153_app3.pdf]

**Year 1 Program costs in US \$ for gradual rollout in Gauteng province, South Africa**

| Parameter                                            | MAMA               |                     |                    | Non-MAMA           |                    |                    | Incremental        |
|------------------------------------------------------|--------------------|---------------------|--------------------|--------------------|--------------------|--------------------|--------------------|
|                                                      | Base case          | High                | Low                | Base case          | High               | Low                |                    |
| <b>Total users</b>                                   |                    |                     |                    |                    |                    |                    |                    |
| Proportion ANC 4+                                    | 72%                | 85%                 | 55%                | 46%                | 53%                | 38%                | 26%                |
| Number ANC 4+ Gauteng                                | 2,073              | 2,447               | 1,583              | 1,324              | 1,526              | 1,094              | 749                |
| Proportion Fully immunized                           | 95%                | 98%                 | 92%                | 90%                | 94%                | 84%                | 5%                 |
| Number Fully immunized                               | 2,735              | 2,821               | 2,649              | 2,591              | 2,706              | 2,418              | 144                |
| Proportion ANC4+ & Fully immunized                   | 67%                | 75%                 | 57%                | 39%                | 53%                | 26%                |                    |
| Number ANC4+ & Fully immunized                       | 1,928.93           | 2,159.25            | 1,641.03           | 1,122.81           | 1,525.87           | 748.54             | 806                |
| Incremental Lives Saved                              |                    |                     |                    |                    |                    |                    | 190.00             |
| Disability adjusted live years averted               |                    |                     |                    |                    |                    |                    | 5,130.00           |
| <b>Provider costs</b>                                |                    |                     |                    |                    |                    |                    |                    |
| Peer educator time costs to register MAMA users      | \$ 0.08            | \$ 0.11             | \$ 0.04            | -                  | -                  | -                  |                    |
| <b>Registration costs Gauteng</b>                    | <b>\$ 221.40</b>   | <b>\$ 323.69</b>    | <b>\$ 124.22</b>   |                    |                    |                    | <b>\$ 221.40</b>   |
| ANC 1 Group counseling (5 minute peer educator)      | \$ 0.26            | \$ 0.37             | \$ 0.14            | \$ 0.26            | \$ 0.37            | \$ 0.14            |                    |
| ANC 1 One on one consultation (10 minute Nurse time) | \$ 1.03            | \$ 1.50             | \$ 0.58            | \$ 1.03            | \$ 1.50            | \$ 0.58            |                    |
| <b>Total ANC1</b>                                    | <b>\$ 1.28</b>     | <b>\$ 1.87</b>      | <b>\$ 0.72</b>     | <b>\$ 1.28</b>     | <b>\$ 1.87</b>     | <b>\$ 0.72</b>     |                    |
| ANC 2                                                | \$ 1.03            | \$ 1.50             | \$ 0.58            | \$ 1.03            | \$ 1.50            | \$ 0.58            |                    |
| ANC 3                                                | \$ 1.03            | \$ 1.50             | \$ 0.58            | \$ 1.03            | \$ 1.50            | \$ 0.58            |                    |
| ANC 4                                                | \$ 1.03            | \$ 1.50             | \$ 0.58            | \$ 1.03            | \$ 1.50            | \$ 0.58            |                    |
| <b>Total ANC 4+</b>                                  | <b>\$ 4.36</b>     | <b>\$ 6.37</b>      | <b>\$ 2.45</b>     | <b>\$ 4.36</b>     | <b>\$ 6.37</b>     | <b>\$ 2.45</b>     |                    |
| <b>ANC 4+ Gauteng</b>                                | <b>\$ 9,033.29</b> | <b>\$ 10,088.27</b> | <b>\$ 5,983.43</b> | <b>\$ 5,771.27</b> | <b>\$ 6,970.08</b> | <b>\$ 3,730.85</b> | <b>\$ 3,262.02</b> |

|                                                                    |                    |                     |                    |                    |                     |                    |                    |  |
|--------------------------------------------------------------------|--------------------|---------------------|--------------------|--------------------|---------------------|--------------------|--------------------|--|
| PNC 1 (10 minute Nurse time)                                       | \$ 1.03            | \$ 1.50             | \$ 0.58            | \$ 1.03            | \$ 1.50             | \$ 0.58            |                    |  |
| PNC 2 (5 minute Nurse time)                                        | \$ 0.51            | \$ 0.75             | \$ 0.29            | \$ 0.51            | \$ 0.75             | \$ 0.29            |                    |  |
| PNC 3 (5 minute Nurse time)                                        | \$ 0.51            | \$ 0.75             | \$ 0.29            | \$ 0.51            | \$ 0.75             | \$ 0.29            |                    |  |
| PNC 4 (5 minute Nurse time)                                        | \$ 0.51            | \$ 0.75             | \$ 0.29            | \$ 0.51            | \$ 0.75             | \$ 0.29            |                    |  |
| PNC 5 (5 minute Nurse time)                                        | \$ 0.51            | \$ 0.75             | \$ 0.29            | \$ 0.51            | \$ 0.75             | \$ 0.29            |                    |  |
| <b>Total PNC 5</b>                                                 | <b>\$ 3.08</b>     | <b>\$ 4.50</b>      | <b>\$ 1.73</b>     | <b>\$ 3.08</b>     | <b>\$ 4.50</b>      | <b>\$ 1.73</b>     |                    |  |
| <b>PNC5+ (Fully immunized) Gauteng</b>                             | <b>\$ 8,413.36</b> | <b>\$ 11,911.72</b> | <b>\$ 4,869.56</b> | <b>\$ 7,970.55</b> | <b>\$ 10,875.91</b> | <b>\$ 4,670.81</b> | <b>\$ 442.81</b>   |  |
| <b>Total provider cost per ANC4+ &amp; Fully immunized Gauteng</b> | <b>17,668</b>      | <b>22,324</b>       | <b>10,977</b>      | <b>13,742</b>      | <b>17,846</b>       | <b>8,402</b>       | <b>\$ 3,926.23</b> |  |
| <b>Users' costs</b>                                                |                    |                     |                    |                    |                     |                    |                    |  |
| <b>Mean PNC cost per person per visit</b>                          |                    |                     |                    |                    |                     |                    |                    |  |
| Food                                                               | \$ 0.03            | \$ 0.03             | \$ 0.03            | \$ 0.03            | \$ 0.03             | \$ 0.03            | \$ -               |  |
| Wages lost (self)                                                  | \$ 0.18            | \$ 0.24             | \$ 0.11            | \$ 0.18            | \$ 0.24             | \$ 0.11            | \$ -               |  |
| Wages lost (spouse)                                                | \$ 1.31            | \$ 1.44             | \$ 1.18            | \$ 1.31            | \$ 1.44             | \$ 1.18            | \$ -               |  |
| Child care for other children                                      | \$ 0.07            | \$ 0.26             | \$ (0.13)          | \$ 0.07            | \$ 0.26             | \$ (0.13)          | \$ -               |  |
| Transport                                                          | \$ 0.08            | \$ 0.34             | \$ (0.18)          | \$ 0.08            | \$ 0.34             | \$ (0.18)          | \$ -               |  |
| <b>sub-total PNC</b>                                               | <b>\$ 1.66</b>     | <b>\$ 2.31</b>      | <b>\$ 1.01</b>     | <b>\$ 1.66</b>     | <b>\$ 2.31</b>      | <b>\$ 1.01</b>     | <b>\$ -</b>        |  |
| PNC Visit 1: Birth                                                 | \$ 1.48            | \$ 2.07             | \$ 0.90            | \$ 1.48            | \$ 2.07             | \$ 0.90            | \$ -               |  |
| PNC Visit 2: 6 week                                                | \$ 1.48            | \$ 2.07             | \$ 0.90            | \$ 1.48            | \$ 2.07             | \$ 0.90            | \$ -               |  |
| PNC Visit 3: 10 week                                               | \$ 1.48            | \$ 2.07             | \$ 0.90            | \$ 1.48            | \$ 2.07             | \$ 0.90            | \$ -               |  |
| PNC Visit 4: 14 week                                               | \$ 1.48            | \$ 2.07             | \$ 0.90            | \$ 1.48            | \$ 2.07             | \$ 0.90            | \$ -               |  |
| PNC Visit 5: 9 months                                              | \$ 1.66            | \$ 2.31             | \$ 1.01            | \$ 1.66            | \$ 2.31             | \$ 1.01            | \$ -               |  |

|                                                                 |           |           |           |           |           |           |    |    |          |
|-----------------------------------------------------------------|-----------|-----------|-----------|-----------|-----------|-----------|----|----|----------|
| <b>Total PNC</b>                                                | \$        | \$        | \$        | \$        | \$        | \$        | \$ | \$ | -        |
|                                                                 | 7.60      | 10.59     | 4.61      | 7.60      | 10.59     | 4.61      |    |    |          |
| <b>PNC5+ (Fully immunized) Gauteng</b>                          | \$        | \$        | \$        | \$        | \$        | \$        | \$ | \$ | \$       |
|                                                                 | 20,784.94 | 28,041.30 | 13,012.54 | 19,691.00 | 25,602.92 | 12,481.42 |    |    | 1,093.94 |
| ANC Visit 1                                                     | \$        | \$        | \$        | \$        | \$        | \$        | \$ | \$ | -        |
|                                                                 | 1.66      | 2.31      | 1.01      | 1.66      | 2.31      | 1.01      |    |    |          |
| ANC Visit 2                                                     | \$        | \$        | \$        | \$        | \$        | \$        | \$ | \$ | -        |
|                                                                 | 1.66      | 2.31      | 1.01      | 1.66      | 2.31      | 1.01      |    |    |          |
| ANC Visit 3                                                     | \$        | \$        | \$        | \$        | \$        | \$        | \$ | \$ | -        |
|                                                                 | 1.66      | 2.31      | 1.01      | 1.66      | 2.31      | 1.01      |    |    |          |
| ANC Visit 4                                                     | \$        | \$        | \$        | \$        | \$        | \$        | \$ | \$ | -        |
|                                                                 | 1.66      | 2.31      | 1.01      | 1.66      | 2.31      | 1.01      |    |    |          |
| <b>Total ANC 1-4</b>                                            | \$        | \$        | \$        | \$        | \$        | \$        | \$ | \$ | -        |
|                                                                 | 6.64      | 9.24      | 4.04      | 6.64      | 9.24      | 4.04      |    |    |          |
| <b>ANC 4+ Gauteng</b>                                           | \$        | \$        | \$        | \$        | \$        | \$        | \$ | \$ | \$       |
|                                                                 | 13,766.49 | 14,629.49 | 9,895.01  | 8,795.26  | 10,107.65 | 6,169.83  |    |    | 4,971.23 |
| <b>Total users cost per ANC4+ &amp; Fully immunized Gauteng</b> | \$        | \$        | \$        | \$        | \$        | \$        | \$ | \$ | \$       |
|                                                                 | 34,551.44 | 42,670.79 | 22,907.55 | 28,486.26 | 35,710.57 | 18,651.25 |    |    | 6,065.18 |
| <b>Annual program costs: Year 4</b>                             |           |           |           |           |           |           |    |    |          |
| <b>Implementation support</b>                                   |           |           |           |           |           |           |    |    |          |
| Development                                                     | \$        | \$        | \$        |           |           |           |    |    | \$       |
|                                                                 | 12.97     | 16.22     | 9.73      |           |           |           |    |    | 12.97    |
| Start-up                                                        | \$        | \$        | \$        |           |           |           |    |    | \$       |
|                                                                 | 6.17      | 7.71      | 4.63      |           |           |           |    |    | 6.17     |
| Training                                                        | \$        | \$        | \$        |           |           |           |    |    | \$       |
|                                                                 | 0.05      | 0.07      | 0.04      |           |           |           |    |    | 0.05     |
| Personnel                                                       | \$        | \$        | \$        |           |           |           |    |    | \$       |
|                                                                 | 6.38      | 7.98      | 4.79      |           |           |           |    |    | 6.38     |
| Buildings                                                       | \$        | \$        | \$        |           |           |           |    |    | \$       |
|                                                                 | 2.08      | 2.59      | 1.56      |           |           |           |    |    | 2.08     |
| Transport                                                       | \$        | \$        | \$        |           |           |           |    |    | \$       |
|                                                                 | 1.12      | 1.40      | 0.84      |           |           |           |    |    | 1.12     |
| Communication                                                   | \$        | \$        | \$        |           |           |           |    |    | \$       |
|                                                                 | 0.19      | 0.23      | 0.14      |           |           |           |    |    | 0.19     |
| <b>Sub-total implementation support</b>                         | \$        | \$        | \$        |           |           |           |    |    | \$       |
|                                                                 | 28.96     | 36.20     | 21.72     |           |           |           |    |    | 28.96    |
| <b>Technology costs</b>                                         |           |           |           |           |           |           |    |    |          |
| Start-up/ Development                                           | \$        | \$        | \$        |           |           |           |    |    | \$       |
|                                                                 | 0.05      | 0.41      | 0.24      |           |           |           |    |    | 0.05     |

|                                    |                   |                   |                   |                  |                  |                  |                   |
|------------------------------------|-------------------|-------------------|-------------------|------------------|------------------|------------------|-------------------|
|                                    | \$                | \$                | \$                |                  |                  |                  | \$                |
| Content maintenance                | 3.64              | 4.55              | 2.73              |                  |                  |                  | 3.64              |
|                                    | \$                | \$                | \$                |                  |                  |                  | \$                |
| Technology maintenance             | 2.88              | 3.59              | 2.16              |                  |                  |                  | 2.88              |
|                                    | \$                | \$                | \$                |                  |                  |                  | \$                |
| Project management/ personnel      | 8.93              | 11.16             | 6.69              |                  |                  |                  | 8.93              |
|                                    | \$                | \$                | \$                |                  |                  |                  | \$                |
| M&E                                | 0.64              | 0.80              | 0.48              |                  |                  |                  | 0.64              |
|                                    | \$                | \$                | \$                |                  |                  |                  | \$                |
| Building/ Overhead                 | 3.50              | 4.37              | 2.62              |                  |                  |                  | 3.50              |
|                                    | \$                | \$                | \$                |                  |                  |                  | \$                |
| Travel                             | 3.94              | 4.93              | 2.96              |                  |                  |                  | 3.94              |
|                                    | \$                | \$                | \$                |                  |                  |                  | \$                |
| SMS Message delivery               | 1.87              | 3.19              | 1.52              |                  |                  |                  | 1.87              |
|                                    | \$                | \$                | \$                |                  |                  |                  | \$                |
| SMS Translation                    | 0.60              | 0.75              | 0.45              |                  |                  |                  | 0.60              |
|                                    | \$                | \$                | \$                |                  |                  |                  | \$                |
| Printing                           | 1.64              | 2.05              | 1.23              |                  |                  |                  | 1.64              |
|                                    | \$                | \$                | \$                |                  |                  |                  | \$                |
| <i>Sub-total technology</i>        | 27.68             | 35.80             | 21.09             |                  |                  |                  | 27.68             |
|                                    | \$                | \$                | \$                |                  |                  |                  | \$                |
| <b>Total program cost per user</b> | 56.65             | 72.01             | 42.81             |                  |                  |                  | 56.65             |
|                                    | \$                | \$                | \$                |                  |                  |                  | \$                |
| <b>Total program cost Gauteng</b>  | <b>163,082.27</b> | <b>207,307.42</b> | <b>123,250.26</b> |                  |                  |                  | <b>163,082.27</b> |
|                                    | \$                | \$                | \$                | \$               | \$               | \$               | \$                |
| <b>Total societal cost Gauteng</b> | <b>215,301.76</b> | <b>272,301.88</b> | <b>157,135.03</b> | <b>42,228.08</b> | <b>53,556.56</b> | <b>27,052.90</b> | <b>173,073.69</b> |
