# Supplementary material for: Forecasting the Value for Money of Mobile Maternal Health Information Messages on Improving Utilization of Maternal and Child Health Services in Gauteng, South Africa: Cost-Effectiveness Analysis
Source: PubMed Central journal article supplement (PMC6086931; doi:10.2196/mhealth.8185), 2018-07-27
Supplement: mhealth_v6i7e153_app5.pdf [file mhealth_v6i7e153_app5.pdf]

**Year 3 Program costs in US \$ for gradual rollout in Gauteng province, South Africa**

| Parameter                                            | MAMA                |                     |                     | Non-MAMA            |                     |                     | Incremental         |
|------------------------------------------------------|---------------------|---------------------|---------------------|---------------------|---------------------|---------------------|---------------------|
|                                                      | Base case           | High                | Low                 | Base case           | High                | Low                 |                     |
| <b>Total users</b>                                   |                     |                     |                     |                     |                     |                     |                     |
| Proportion ANC 4+                                    | 72%                 | 85%                 | 55%                 | 46%                 | 53%                 | 38%                 | 26%                 |
| Number ANC 4+ Gauteng                                | 13,261              | 15,656              | 10,130              | 8,473               | 9,762               | 6,999               | 4,789               |
| Proportion Fully immunized                           | 95%                 | 98%                 | 92%                 | 90%                 | 94%                 | 84%                 | 5%                  |
| Number Fully immunized                               | 17,498              | 18,050              | 16,945              | 16,577              | 17,313              | 15,472              | 921                 |
| Proportion ANC4+ & Fully immunized                   | 67%                 | 75%                 | 57%                 | 39%                 | 53%                 | 26%                 |                     |
| Number ANC4+ & Fully immunized                       | 12,340.46           | 13,813.95           | 10,498.60           | 7,183.25            | 9,761.86            | 4,788.84            | 5,157               |
| Incremental Lives Saved                              |                     |                     |                     |                     |                     |                     | 190.00              |
| Disability adjusted live years averted               |                     |                     |                     |                     |                     |                     | 5,130.00            |
| <b>Provider costs</b>                                |                     |                     |                     |                     |                     |                     |                     |
| Peer educator time costs to register MAMA users      | \$ 0.08             | \$ 0.11             | \$ 0.04             | -                   | -                   | -                   |                     |
| <b>Registration costs Gauteng</b>                    | <b>\$ 1,416.45</b>  | <b>\$ 2,070.82</b>  | <b>\$ 794.73</b>    |                     |                     |                     | <b>\$ 1,416.45</b>  |
| ANC 1 Group counseling (5 minute peer educator)      | \$ 0.26             | \$ 0.37             | \$ 0.14             | \$ 0.26             | \$ 0.37             | \$ 0.14             |                     |
| ANC 1 One on one consultation (10 minute Nurse time) | \$ 1.03             | \$ 1.50             | \$ 0.58             | \$ 1.03             | \$ 1.50             | \$ 0.58             |                     |
| <b>Total ANC1</b>                                    | <b>\$ 1.28</b>      | <b>\$ 1.87</b>      | <b>\$ 0.72</b>      | <b>\$ 1.28</b>      | <b>\$ 1.87</b>      | <b>\$ 0.72</b>      |                     |
| <b>ANC 2</b>                                         | <b>\$ 1.03</b>      | <b>\$ 1.50</b>      | <b>\$ 0.58</b>      | <b>\$ 1.03</b>      | <b>\$ 1.50</b>      | <b>\$ 0.58</b>      |                     |
| <b>ANC 3</b>                                         | <b>\$ 1.03</b>      | <b>\$ 1.50</b>      | <b>\$ 0.58</b>      | <b>\$ 1.03</b>      | <b>\$ 1.50</b>      | <b>\$ 0.58</b>      |                     |
| <b>ANC 4</b>                                         | <b>\$ 1.03</b>      | <b>\$ 1.50</b>      | <b>\$ 0.58</b>      | <b>\$ 1.03</b>      | <b>\$ 1.50</b>      | <b>\$ 0.58</b>      |                     |
| <b>Total ANC 4+</b>                                  | <b>\$ 4.36</b>      | <b>\$ 6.37</b>      | <b>\$ 2.45</b>      | <b>\$ 4.36</b>      | <b>\$ 6.37</b>      | <b>\$ 2.45</b>      |                     |
| <b>ANC 4+ Gauteng</b>                                | <b>\$ 57,791.10</b> | <b>\$ 64,540.43</b> | <b>\$ 38,279.44</b> | <b>\$ 36,922.09</b> | <b>\$ 44,591.57</b> | <b>\$ 23,868.36</b> | <b>\$ 20,869.01</b> |

|                                                                    |                  |                  |                  |                  |                  |                  |    |                  |
|--------------------------------------------------------------------|------------------|------------------|------------------|------------------|------------------|------------------|----|------------------|
| PNC 1 (10 minute Nurse time)                                       | \$               | \$               | \$               | \$               | \$               | \$               |    |                  |
|                                                                    | 1.03             | 1.50             | 0.58             | 1.03             | 1.50             | 0.58             |    |                  |
| PNC 2 (5 minute Nurse time)                                        | \$               | \$               | \$               | \$               | \$               | \$               |    |                  |
|                                                                    | 0.51             | 0.75             | 0.29             | 0.51             | 0.75             | 0.29             |    |                  |
| PNC 3 (5 minute Nurse time)                                        | \$               | \$               | \$               | \$               | \$               | \$               |    |                  |
|                                                                    | 0.51             | 0.75             | 0.29             | 0.51             | 0.75             | 0.29             |    |                  |
| PNC 4 (5 minute Nurse time)                                        | \$               | \$               | \$               | \$               | \$               | \$               |    |                  |
|                                                                    | 0.51             | 0.75             | 0.29             | 0.51             | 0.75             | 0.29             |    |                  |
| PNC 5 (5 minute Nurse time)                                        | \$               | \$               | \$               | \$               | \$               | \$               |    |                  |
|                                                                    | 0.51             | 0.75             | 0.29             | 0.51             | 0.75             | 0.29             |    |                  |
| <b>Total PNC 5</b>                                                 | \$               | \$               | \$               | \$               | \$               | \$               |    |                  |
|                                                                    | <b>3.08</b>      | <b>4.50</b>      | <b>1.73</b>      | <b>3.08</b>      | <b>4.50</b>      | <b>1.73</b>      |    |                  |
| <b>PNC5+ (Fully immunized) Gauteng</b>                             | \$               | \$               | \$               | \$               | \$               | \$               | \$ | \$               |
|                                                                    | <b>53,825.04</b> | <b>76,206.03</b> | <b>31,153.37</b> | <b>50,992.15</b> | <b>69,579.41</b> | <b>29,881.80</b> |    | <b>2,832.90</b>  |
| <b>Total provider cost per ANC4+ &amp; Fully immunized Gauteng</b> |                  |                  |                  |                  |                  |                  |    | \$               |
|                                                                    | <b>113,033</b>   | <b>142,817</b>   | <b>70,228</b>    | <b>87,914</b>    | <b>114,171</b>   | <b>53,750</b>    |    | <b>25,118.35</b> |
| <b>Users' costs</b>                                                |                  |                  |                  |                  |                  |                  |    |                  |
| <b>Mean PNC cost per person per visit</b>                          |                  |                  |                  |                  |                  |                  |    |                  |
| Food                                                               | \$               | \$               | \$               | \$               | \$               | \$               | \$ | -                |
|                                                                    | 0.03             | 0.03             | 0.03             | 0.03             | 0.03             | 0.03             |    |                  |
| Wages lost (self)                                                  | \$               | \$               | \$               | \$               | \$               | \$               | \$ | -                |
|                                                                    | 0.18             | 0.24             | 0.11             | 0.18             | 0.24             | 0.11             |    |                  |
| Wages lost (spouse)                                                | \$               | \$               | \$               | \$               | \$               | \$               | \$ | -                |
|                                                                    | 1.31             | 1.44             | 1.18             | 1.31             | 1.44             | 1.18             |    |                  |
| Child care for other children                                      | \$               | \$               | \$               | \$               | \$               | \$               | \$ | -                |
|                                                                    | 0.07             | 0.26             | (0.13)           | 0.07             | 0.26             | (0.13)           |    |                  |
| Transport                                                          | \$               | \$               | \$               | \$               | \$               | \$               | \$ | -                |
|                                                                    | 0.08             | 0.34             | (0.18)           | 0.08             | 0.34             | (0.18)           |    |                  |
| <b>sub-total PNC</b>                                               | \$               | \$               | \$               | \$               | \$               | \$               | \$ | -                |
|                                                                    | <b>1.66</b>      | <b>2.31</b>      | <b>1.01</b>      | <b>1.66</b>      | <b>2.31</b>      | <b>1.01</b>      |    |                  |
| PNC Visit 1: Birth                                                 | \$               | \$               | \$               | \$               | \$               | \$               | \$ | -                |
|                                                                    | 1.48             | 2.07             | 0.90             | 1.48             | 2.07             | 0.90             |    |                  |
| PNC Visit 2: 6 week                                                | \$               | \$               | \$               | \$               | \$               | \$               | \$ | -                |
|                                                                    | 1.48             | 2.07             | 0.90             | 1.48             | 2.07             | 0.90             |    |                  |
| PNC Visit 3: 10 week                                               | \$               | \$               | \$               | \$               | \$               | \$               | \$ | -                |
|                                                                    | 1.48             | 2.07             | 0.90             | 1.48             | 2.07             | 0.90             |    |                  |
| PNC Visit 4: 14 week                                               | \$               | \$               | \$               | \$               | \$               | \$               | \$ | -                |
|                                                                    | 1.48             | 2.07             | 0.90             | 1.48             | 2.07             | 0.90             |    |                  |
| PNC Visit 5: 9 months                                              | \$               | \$               | \$               | \$               | \$               | \$               | \$ | -                |
|                                                                    | 1.66             | 2.31             | 1.01             | 1.66             | 2.31             | 1.01             |    |                  |

|                                                                 |            |            |            |            |            |            |    |    |           |
|-----------------------------------------------------------------|------------|------------|------------|------------|------------|------------|----|----|-----------|
| <b>Total PNC</b>                                                | \$         | \$         | \$         | \$         | \$         | \$         | \$ | \$ | -         |
|                                                                 | 7.60       | 10.59      | 4.61       | 7.60       | 10.59      | 4.61       |    |    |           |
| <b>PNC5+ (Fully immunized) Gauteng</b>                          | \$         | \$         | \$         | \$         | \$         | \$         | \$ | \$ | \$        |
|                                                                 | 132,973.12 | 179,396.14 | 83,248.64  | 125,974.53 | 163,796.48 | 79,850.74  |    |    | 6,998.59  |
| ANC Visit 1                                                     | \$         | \$         | \$         | \$         | \$         | \$         | \$ | \$ | -         |
|                                                                 | 1.66       | 2.31       | 1.01       | 1.66       | 2.31       | 1.01       |    |    |           |
| ANC Visit 2                                                     | \$         | \$         | \$         | \$         | \$         | \$         | \$ | \$ | -         |
|                                                                 | 1.66       | 2.31       | 1.01       | 1.66       | 2.31       | 1.01       |    |    |           |
| ANC Visit 3                                                     | \$         | \$         | \$         | \$         | \$         | \$         | \$ | \$ | -         |
|                                                                 | 1.66       | 2.31       | 1.01       | 1.66       | 2.31       | 1.01       |    |    |           |
| ANC Visit 4                                                     | \$         | \$         | \$         | \$         | \$         | \$         | \$ | \$ | -         |
|                                                                 | 1.66       | 2.31       | 1.01       | 1.66       | 2.31       | 1.01       |    |    |           |
| <b>Total ANC 1-4</b>                                            | \$         | \$         | \$         | \$         | \$         | \$         | \$ | \$ | -         |
|                                                                 | 6.64       | 9.24       | 4.04       | 6.64       | 9.24       | 4.04       |    |    |           |
| <b>ANC 4+ Gauteng</b>                                           | \$         | \$         | \$         | \$         | \$         | \$         | \$ | \$ | \$        |
|                                                                 | 88,072.08  | 93,593.16  | 63,304.00  | 56,268.28  | 64,664.37  | 39,471.90  |    |    | 31,803.81 |
| <b>Total users cost per ANC4+ &amp; Fully immunized Gauteng</b> | \$         | \$         | \$         | \$         | \$         | \$         | \$ | \$ | \$        |
|                                                                 | 221,045.20 | 272,989.31 | 146,552.64 | 182,242.81 | 228,460.85 | 119,322.64 |    |    | 38,802.39 |
| <b>Annual program costs: Year 4</b>                             |            |            |            |            |            |            |    |    |           |
| <b>Implementation support</b>                                   |            |            |            |            |            |            |    |    |           |
| Development                                                     | \$         | \$         | \$         |            |            |            |    |    | \$        |
|                                                                 | 2.15       | 2.61       | 1.57       |            |            |            |    |    | 2.15      |
| Start-up                                                        | \$         | \$         | \$         |            |            |            |    |    | \$        |
|                                                                 | 1.02       | 1.24       | 0.75       |            |            |            |    |    | 1.02      |
| Training                                                        | \$         | \$         | \$         |            |            |            |    |    | \$        |
|                                                                 | 0.00       | 0.01       | 0.00       |            |            |            |    |    | 0.00      |
| Personnel                                                       | \$         | \$         | \$         |            |            |            |    |    | \$        |
|                                                                 | 1.07       | 1.33       | 0.80       |            |            |            |    |    | 1.07      |
| Buildings                                                       | \$         | \$         | \$         |            |            |            |    |    | \$        |
|                                                                 | 0.32       | 0.40       | 0.24       |            |            |            |    |    | 0.32      |
| Transport                                                       | \$         | \$         | \$         |            |            |            |    |    | \$        |
|                                                                 | 0.17       | 0.22       | 0.13       |            |            |            |    |    | 0.17      |
| Communication                                                   | \$         | \$         | \$         |            |            |            |    |    | \$        |
|                                                                 | 0.03       | 0.04       | 0.02       |            |            |            |    |    | 0.03      |
| <b>Sub-total implementation support</b>                         | 4.67       | 5.84       | 3.51       |            |            |            |    |    | 4.67      |
| <b>Technology costs</b>                                         |            |            |            |            |            |            |    |    |           |
| Start-up/ Development                                           | \$         | \$         | \$         |            |            |            |    |    | \$        |
|                                                                 | 0.01       | 0.07       | 0.04       |            |            |            |    |    | 0.01      |

|                                    |               |               |               |               |               |               |               |
|------------------------------------|---------------|---------------|---------------|---------------|---------------|---------------|---------------|
| Content maintenance                | \$ 0.50       | \$ 0.62       | \$ 0.37       |               |               |               | \$ 0.50       |
| Technology maintenance             | \$ 1.00       | \$ 1.26       | \$ 0.75       |               |               |               | \$ 1.00       |
| Project management/ personnel      | \$ 0.85       | \$ 1.06       | \$ 0.63       |               |               |               | \$ 0.85       |
| M&E                                | \$ 0.01       | \$ 0.01       | \$ 0.00       |               |               |               | \$ 0.01       |
| Building/ Overhead                 | \$ 0.66       | \$ 0.83       | \$ 0.50       |               |               |               | \$ 0.66       |
| Travel                             | \$ 0.17       | \$ 0.21       | \$ 0.13       |               |               |               | \$ 0.17       |
| SMS Message delivery               | \$ 1.26       | \$ 2.36       | \$ 1.02       |               |               |               | \$ 1.26       |
| SMS Translation                    | \$ 0.10       | \$ 0.13       | \$ 0.08       |               |               |               |               |
| Printing                           | \$ -          | \$ -          | \$ -          |               |               |               | \$ -          |
| <b><i>Sub-total technology</i></b> | \$ 4.56       | \$ 6.54       | \$ 3.53       |               |               |               | \$ 4.56       |
| <b>Total program cost per user</b> | 9.23          | 12.38         | 7.03          |               |               |               | 9.23          |
| <b>Total program cost Gauteng</b>  | \$ 170,007.86 | \$ 228,013.02 | \$ 129,551.78 |               |               |               | \$ 170,007.86 |
| <b>Total societal cost Gauteng</b> | \$ 504,085.64 | \$ 643,819.60 | \$ 346,331.95 | \$ 270,157.04 | \$ 342,631.83 | \$ 173,072.80 | \$ 233,928.60 |
