# Supplementary material for: Forecasting the Value for Money of Mobile Maternal Health Information Messages on Improving Utilization of Maternal and Child Health Services in Gauteng, South Africa: Cost-Effectiveness Analysis
Source: PubMed Central journal article supplement (PMC6086931; doi:10.2196/mhealth.8185), 2018-07-27
Supplement: mhealth_v6i7e153_app6.pdf [file mhealth_v6i7e153_app6.pdf]

**Year 4 Program costs in US \$ for gradual rollout in Gauteng province, South Africa**

| Parameter                                            | MAMA                 |                      |                      | Non-MAMA             |                      |                     | Incremental         |
|------------------------------------------------------|----------------------|----------------------|----------------------|----------------------|----------------------|---------------------|---------------------|
|                                                      | Base case            | High                 | Low                  | Base case            | High                 | Low                 |                     |
| <b>Total users</b>                                   |                      |                      |                      |                      |                      |                     |                     |
| Proportion ANC 4+                                    | 72%                  | 85%                  | 55%                  | 46%                  | 53%                  | 38%                 | 26%                 |
| Number ANC 4+ Gauteng                                | 41,193.99            | 48,632               | 31,468               | 26,318               | 30,323               | 21,741              | 14,876              |
| Proportion Fully immunized                           | 95%                  | 98%                  | 92%                  | 90%                  | 94%                  | 84%                 | 5%                  |
| Number Fully immunized                               | 54,353               | 56,070               | 52,637               | 51,492               | 53,781               | 48,060              | 2,861               |
| Proportion ANC4+ & Fully immunized                   | 67%                  | 75%                  | 57%                  | 39%                  | 53%                  | 26%                 |                     |
| Number ANC4+ & Fully immunized                       | 38,333.29            | 42,910.40            | 32,611.91            | 22,313.41            | 30,323.35            | 14,875.61           | 16,020              |
| Incremental Lives Saved                              |                      |                      |                      |                      |                      |                     | 190.00              |
| Disability adjusted live years averted               |                      |                      |                      |                      |                      |                     | 5,130.00            |
| <b>Provider costs</b>                                |                      |                      |                      |                      |                      |                     |                     |
| Peer educator time costs to register MAMA users      | \$ 0.08              | \$ 0.11              | \$ 0.04              | -                    | -                    | -                   |                     |
| <b>Registration costs Gauteng</b>                    | <b>4,399.93</b>      | <b>6,432.59</b>      | <b>2,468.67</b>      |                      |                      |                     | <b>\$ 4,399.93</b>  |
| ANC 1 Group counseling (5 minute peer educator)      | \$ 0.26              | \$ 0.37              | \$ 0.14              | \$ 0.26              | \$ 0.37              | \$ 0.14             |                     |
| ANC 1 One on one consultation (10 minute Nurse time) | \$ 1.03              | \$ 1.50              | \$ 0.58              | \$ 1.03              | \$ 1.50              | \$ 0.58             |                     |
| <b>Total ANC1</b>                                    | <b>\$ 1.28</b>       | <b>\$ 1.87</b>       | <b>\$ 0.72</b>       | <b>\$ 1.28</b>       | <b>\$ 1.87</b>       | <b>\$ 0.72</b>      |                     |
| <b>ANC 2</b>                                         | <b>\$ 1.03</b>       | <b>\$ 1.50</b>       | <b>\$ 0.58</b>       | <b>\$ 1.03</b>       | <b>\$ 1.50</b>       | <b>\$ 0.58</b>      |                     |
| <b>ANC 3</b>                                         | <b>\$ 1.03</b>       | <b>\$ 1.50</b>       | <b>\$ 0.58</b>       | <b>\$ 1.03</b>       | <b>\$ 1.50</b>       | <b>\$ 0.58</b>      |                     |
| <b>ANC 4</b>                                         | <b>\$ 1.03</b>       | <b>\$ 1.50</b>       | <b>\$ 0.58</b>       | <b>\$ 1.03</b>       | <b>\$ 1.50</b>       | <b>\$ 0.58</b>      |                     |
| <b>Total ANC 4+</b>                                  | <b>\$ 4.36</b>       | <b>\$ 6.37</b>       | <b>\$ 2.45</b>       | <b>\$ 4.36</b>       | <b>\$ 6.37</b>       | <b>\$ 2.45</b>      |                     |
| <b>ANC 4+ Gauteng</b>                                | <b>\$ 179,517.01</b> | <b>\$ 200,482.52</b> | <b>\$ 118,907.77</b> | <b>\$ 114,691.42</b> | <b>\$ 138,515.19</b> | <b>\$ 74,142.49</b> | <b>\$ 64,825.59</b> |

|                                                                    |                   |                   |                  |                   |    |                   |                  |                  |
|--------------------------------------------------------------------|-------------------|-------------------|------------------|-------------------|----|-------------------|------------------|------------------|
| PNC 1 (10 minute Nurse time)                                       | \$                | \$                | \$               | \$                | \$ | 1.50              | \$               |                  |
|                                                                    | 1.03              | 1.50              | 0.58             | 1.03              | \$ |                   | 0.58             |                  |
| PNC 2 (5 minute Nurse time)                                        | \$                | \$                | \$               | \$                | \$ | 0.75              | \$               |                  |
|                                                                    | 0.51              | 0.75              | 0.29             | 0.51              | \$ |                   | 0.29             |                  |
| PNC 3 (5 minute Nurse time)                                        | \$                | \$                | \$               | \$                | \$ | 0.75              | \$               |                  |
|                                                                    | 0.51              | 0.75              | 0.29             | 0.51              | \$ |                   | 0.29             |                  |
| PNC 4 (5 minute Nurse time)                                        | \$                | \$                | \$               | \$                | \$ | 0.75              | \$               |                  |
|                                                                    | 0.51              | 0.75              | 0.29             | 0.51              | \$ |                   | 0.29             |                  |
| PNC 5 (5 minute Nurse time)                                        | \$                | \$                | \$               | \$                | \$ | 0.75              | \$               |                  |
|                                                                    | 0.51              | 0.75              | 0.29             | 0.51              | \$ |                   | 0.29             |                  |
| <b>Total PNC 5</b>                                                 | \$                | \$                | \$               | \$                | \$ | <b>4.50</b>       | \$               |                  |
|                                                                    | <b>3.08</b>       | <b>4.50</b>       | <b>1.73</b>      | <b>3.08</b>       | \$ |                   | <b>1.73</b>      |                  |
| <b>PNC5+ (Fully immunized) Gauteng</b>                             | \$                | \$                | \$               | \$                | \$ |                   | \$               | \$               |
|                                                                    | <b>167,197.21</b> | <b>236,719.46</b> | <b>96,771.99</b> | <b>158,397.36</b> |    | <b>216,135.16</b> | <b>92,822.12</b> | <b>8,799.85</b>  |
| <b>Total provider cost per ANC4+ &amp; Fully immunized Gauteng</b> |                   |                   |                  |                   |    | <b>354,650</b>    | <b>166,965</b>   | <b>\$</b>        |
|                                                                    | <b>351,114</b>    | <b>443,635</b>    | <b>218,148</b>   | <b>273,089</b>    |    |                   |                  | <b>78,025.37</b> |
| <b>Users' costs</b>                                                |                   |                   |                  |                   |    |                   |                  |                  |
| <b>Mean PNC cost per person per visit</b>                          |                   |                   |                  |                   |    |                   |                  |                  |
| Food                                                               | \$                | \$                | \$               | \$                | \$ | 0.03              | \$               | \$               |
|                                                                    | 0.03              | 0.03              | 0.03             | 0.03              | \$ |                   | 0.03             | -                |
| Wages lost (self)                                                  | \$                | \$                | \$               | \$                | \$ | 0.24              | \$               | \$               |
|                                                                    | 0.18              | 0.24              | 0.11             | 0.18              | \$ |                   | 0.11             | -                |
| Wages lost (spouse)                                                | \$                | \$                | \$               | \$                | \$ | 1.44              | \$               | \$               |
|                                                                    | 1.31              | 1.44              | 1.18             | 1.31              | \$ |                   | 1.18             | -                |
| Child care for other children                                      | \$                | \$                | \$               | \$                | \$ | 0.26              | \$               | \$               |
|                                                                    | 0.07              | 0.26              | (0.13)           | 0.07              | \$ |                   | (0.13)           | -                |
| Transport                                                          | \$                | \$                | \$               | \$                | \$ | 0.34              | \$               | \$               |
|                                                                    | 0.08              | 0.34              | (0.18)           | 0.08              | \$ |                   | (0.18)           | -                |
| <b>sub-total PNC</b>                                               | \$                | \$                | \$               | \$                | \$ | <b>2.31</b>       | \$               | \$               |
|                                                                    | <b>1.66</b>       | <b>2.31</b>       | <b>1.01</b>      | <b>1.66</b>       | \$ |                   | <b>1.01</b>      | -                |
| PNC Visit 1: Birth                                                 | \$                | \$                | \$               | \$                | \$ | 2.07              | \$               | \$               |
|                                                                    | 1.48              | 2.07              | 0.90             | 1.48              | \$ |                   | 0.90             | -                |
| PNC Visit 2: 6 week                                                | \$                | \$                | \$               | \$                | \$ | 2.07              | \$               | \$               |
|                                                                    | 1.48              | 2.07              | 0.90             | 1.48              | \$ |                   | 0.90             | -                |
| PNC Visit 3: 10 week                                               | \$                | \$                | \$               | \$                | \$ | 2.07              | \$               | \$               |
|                                                                    | 1.48              | 2.07              | 0.90             | 1.48              | \$ |                   | 0.90             | -                |
| PNC Visit 4: 14 week                                               | \$                | \$                | \$               | \$                | \$ | 2.07              | \$               | \$               |
|                                                                    | 1.48              | 2.07              | 0.90             | 1.48              | \$ |                   | 0.90             | -                |
| PNC Visit 5: 9 months                                              | \$                | \$                | \$               | \$                | \$ | 2.31              | \$               | \$               |
|                                                                    | 1.66              | 2.31              | 1.01             | 1.66              | \$ |                   | 1.01             | -                |

|                                                                 |            |            |            |            |            |            |            |            |
|-----------------------------------------------------------------|------------|------------|------------|------------|------------|------------|------------|------------|
| <b>Total PNC</b>                                                | \$         | \$         | \$         | \$         | \$         | \$         | \$         | \$         |
|                                                                 | 7.60       | 10.59      | 4.61       | 7.60       | 10.59      | 4.61       | -          | -          |
| <b>PNC5+ (Fully immunized) Gauteng</b>                          | \$         | \$         | \$         | \$         | \$         | \$         | \$         | \$         |
|                                                                 | 413,055.59 | 557,259.86 | 258,596.01 | 391,315.82 | 508,802.48 | 248,041.07 | 21,739.77  | 21,739.77  |
| ANC Visit 1                                                     | \$         | \$         | \$         | \$         | \$         | \$         | \$         | \$         |
|                                                                 | 1.66       | 2.31       | 1.01       | 1.66       | 2.31       | 1.01       | -          | -          |
| ANC Visit 2                                                     | \$         | \$         | \$         | \$         | \$         | \$         | \$         | \$         |
|                                                                 | 1.66       | 2.31       | 1.01       | 1.66       | 2.31       | 1.01       | -          | -          |
| ANC Visit 3                                                     | \$         | \$         | \$         | \$         | \$         | \$         | \$         | \$         |
|                                                                 | 1.66       | 2.31       | 1.01       | 1.66       | 2.31       | 1.01       | -          | -          |
| ANC Visit 4                                                     | \$         | \$         | \$         | \$         | \$         | \$         | \$         | \$         |
|                                                                 | 1.66       | 2.31       | 1.01       | 1.66       | 2.31       | 1.01       | -          | -          |
| <b>Total ANC 1-4</b>                                            | \$         | \$         | \$         | \$         | \$         | \$         | \$         | \$         |
|                                                                 | 6.64       | 9.24       | 4.04       | 6.64       | 9.24       | 4.04       | -          | -          |
| <b>ANC 4+ Gauteng</b>                                           | \$         | \$         | \$         | \$         | \$         | \$         | \$         | \$         |
|                                                                 | 273,579.11 | 290,729.29 | 196,641.78 | 174,786.65 | 200,867.51 | 122,611.93 | 98,792.46  | 98,792.46  |
| <b>Total users cost per ANC4+ &amp; Fully immunized Gauteng</b> | \$         | \$         | \$         | \$         | \$         | \$         | \$         | \$         |
|                                                                 | 686,634.70 | 847,989.14 | 455,237.78 | 566,102.47 | 709,669.98 | 370,653.00 | 120,532.22 | 120,532.22 |
| <b>Annual program costs: Year 4</b>                             |            |            |            |            |            |            |            |            |
| <b>Implementation support</b>                                   |            |            |            |            |            |            |            |            |
| Development                                                     | \$         | \$         | \$         |            |            |            |            | \$         |
|                                                                 | 0.69       | 0.87       | 0.52       |            |            |            |            | 0.69       |
| Start-up                                                        | \$         | \$         | \$         |            |            |            |            | \$         |
|                                                                 | 0.33       | 0.41       | 0.25       |            |            |            |            | 0.33       |
| Training                                                        | \$         | \$         | \$         |            |            |            |            | \$         |
|                                                                 | -          | -          | -          |            |            |            |            | -          |
| Personnel                                                       | \$         | \$         | \$         |            |            |            |            | \$         |
|                                                                 | 0.36       | 0.45       | 0.27       |            |            |            |            | 0.36       |
| Buildings                                                       | \$         | \$         | \$         |            |            |            |            | \$         |
|                                                                 | 0.11       | 0.13       | 0.08       |            |            |            |            | 0.11       |
| Transport                                                       | \$         | \$         | \$         |            |            |            |            | \$         |
|                                                                 | 0.06       | 0.07       | 0.04       |            |            |            |            | 0.06       |
| Communication                                                   | \$         | \$         | \$         |            |            |            |            | \$         |
|                                                                 | 0.01       | 0.01       | 0.01       |            |            |            |            | 0.01       |
| <b>Sub-total implementation support</b>                         | 1.56       | 1.95       | 1.17       |            |            |            |            | 1.56       |
| <b>Technology costs</b>                                         |            |            |            |            |            |            |            |            |
| Start-up/ Development                                           | \$         | \$         | \$         |            |            |            |            | \$         |
|                                                                 | 0.00       | 0.02       | 0.01       |            |            |            |            | 0.00       |

|                                    |                     |                     |                   |                   |                       |                   |                   |
|------------------------------------|---------------------|---------------------|-------------------|-------------------|-----------------------|-------------------|-------------------|
| Content maintenance                | \$                  | \$                  | \$                |                   |                       |                   | \$                |
|                                    | 0.17                | 0.21                | 0.12              |                   |                       |                   | 0.17              |
| Technology maintenance             | \$                  | \$                  | \$                |                   |                       |                   | \$                |
|                                    | 0.34                | 0.42                | 0.25              |                   |                       |                   | 0.34              |
| Project management/ personnel      | \$                  | \$                  | \$                |                   |                       |                   | \$                |
|                                    | 0.29                | 0.36                | 0.22              |                   |                       |                   | 0.29              |
| M&E                                | \$                  | \$                  | \$                |                   |                       |                   | \$                |
|                                    | 0.00                | 0.00                | 0.00              |                   |                       |                   | 0.00              |
| Building/ Overhead                 | \$                  | \$                  | \$                |                   |                       |                   | \$                |
|                                    | 0.22                | 0.28                | 0.17              |                   |                       |                   | 0.22              |
| Travel                             | \$                  | \$                  | \$                |                   |                       |                   | \$                |
|                                    | 0.06                | 0.07                | 0.04              |                   |                       |                   | 0.06              |
| SMS Message delivery               | \$                  | \$                  | \$                |                   |                       |                   | \$                |
|                                    | 1.32                | 2.36                | 1.02              |                   |                       |                   | 1.32              |
| SMS Translation                    | \$                  | \$                  | \$                |                   |                       |                   | \$                |
|                                    | 0.03                | 0.04                | 0.02              |                   |                       |                   |                   |
| Printing                           | \$                  | \$                  | \$                |                   |                       |                   | \$                |
|                                    | -                   | -                   | -                 |                   |                       |                   | -                 |
| <i>Sub-total technology</i>        | \$                  | \$                  | \$                |                   |                       |                   | \$                |
|                                    | 2.43                | 3.77                | 1.87              |                   |                       |                   | 2.43              |
| <b>Total program cost per user</b> | \$                  | \$                  | \$                |                   |                       |                   | \$                |
|                                    | 3.98                | 5.71                | 3.03              |                   |                       |                   | 3.98              |
| <b>Total program cost Gauteng</b>  | \$                  | \$                  | \$                |                   |                       |                   | \$                |
|                                    | <b>227,964.40</b>   | <b>326,872.13</b>   | <b>173,583.78</b> |                   |                       |                   | <b>227,964.40</b> |
| <b>Total societal cost Gauteng</b> | \$                  | \$                  | \$                | \$                | \$                    | \$                | \$                |
|                                    | <b>1,265,713.25</b> | <b>1,618,495.85</b> | <b>846,970.00</b> | <b>839,191.26</b> | <b>\$1,064,320.34</b> | <b>537,617.61</b> | <b>426,521.99</b> |
